# Supplementary material for: Synthesis, characterization and biological properties of new hybrid carbosilane–viologen–phosphorus dendrimers
Source: Royal Society of Chemistry journal article supplement (doi:10.1039/c5ra00960j), 2015-01-01

## Supporting Information

### Synthesis, Characterization and Biological Properties of New Hybrid Carbosilane-Viologen-Phosphorus Dendrimers

Silvia Moreno<sup>a,f</sup>, Aleksandra Szwed<sup>b</sup>, Nabil El Brahmi<sup>c,d</sup>, Katarzyna Milowska<sup>b</sup>, Joanna Kurowska<sup>b</sup>, Elena Fuentes-Paniagua<sup>a,f</sup>, Elzbieta Pedziwiatr-Werbicka<sup>b</sup>, Teresa Gabryelak<sup>b</sup>, Nadia Katir<sup>d</sup>, F. Javier de la Mata<sup>a,f</sup>, M<sup>a</sup> Angeles Muñoz-Fernández<sup>e,f</sup>, Rafael Gomez-Ramirez<sup>\*a,f</sup>, Anne-Marie Caminade<sup>c</sup>, Jean-Pierre Majoral<sup>\*c</sup>, Maria Bryszewska<sup>\*b</sup>

<sup>a</sup>Departamento de Química Orgánica y Química Inorgánica, Universidad de Alcalá, Campus Universitario, E-28871 Alcalá de Henares (Spain).

<sup>b</sup>Department of General Biophysics, Faculty of Biology and Environmental Protection, University of Lodz, 141/143 Pomorska Street, 90-236 Lodz, Poland

<sup>c</sup>Laboratoire de Chimie de Coordinations du CNRS, 205 route de Narbonne, BP 44099, Toulouse cedex4, France

<sup>d</sup>Euro-Mediterranean University of Fès, Route de Sidi Hrazem, Fès Shore, 30070 Fès, Morocco

<sup>e</sup>Laboratorio de Inmunobiología Molecular, Hospital General Universitario Gregorio Marañón, Madrid (Spain).

<sup>f</sup>Networking Research Center on Bioengineering, Biomaterials and Nanomedicine (CIBER-BBN), Spain.

**Synthesis of dendrimer  $\{N_3P_3[(\text{Viologen})G_1\text{CBS}(\text{NH}_3)_2]_6\}(\text{Cl})_{24}$  (**11**).** Dendrimer **9** (360 mg, 0.049 mmol) was desprotected with 5 mL of a solution of TFA at 20% in dichloromethane anhydrous, the mixture was stirred for 30 min. The solvent was removed in vacuum. After the crude was dissolved in acetonitrile (20 mL) and 3 mL of a saturated aqueous solution of  ${}^t\text{Bu}_4\text{NCl}$  added carefully. The resulting solid was filtered and washed many times with acetonitrile, obtaining the compound **11** as yellow solid (200 mg, 78%).

${}^1\text{H}$  NMR (300 MHz,  $\text{CD}_3\text{OD}$ ):  $\delta$  0.03 (s, 90H,  $\text{SiMe}$  and  $\text{SiMe}_2$ ), 0.60 (m, 84H,  $\text{SiCH}_2\text{CH}_2\text{CH}_2\text{NH}$  and  $\text{SiCH}_2$ ), 1.41 (m, 36H,  $\text{CH}_2$ ), 1.66 (m, 24H,  $\text{CH}_2$ ), 2.11 (m, 12H,  $\text{N}^+\text{CH}_2\text{CH}_2$ ), 2.90 (m, 24H,  $\text{CH}_2\text{NH}$ ), 3.31 (s, 18H,  $\text{CH}_3$  overlapped with methanol), 4.74 (t, 12H,  $\text{N}^+\text{CH}_2$ ), 5.93 (s, 12H,  $\text{CH}_2$ ), 7.51 (m, 12H,  $\text{H}^3$ ), 7.78 (m, 18H,  $\text{H}^2$  and  $\text{CH}=\text{N}$ ), 8.65 (m, 24H,  $\text{H}^6$  and  $\text{H}^9$ ), 9.27 (m, 24H,  $\text{H}^5$  and  $\text{H}^{10}$ ).  ${}^{13}\text{C}$   $\{^1\text{H}\}$  NMR (75 MHz,  $\text{CD}_3\text{OD}$ ):  $\delta$  -5.05 ( $\text{SiMe}$ ), -3.44 ( $\text{SiMe}_2$ ), 13.04-24.79 ( $\text{SiCH}_2$ ), 36.70 ( $\text{N}^+\text{CH}_2\text{CH}_2$ ), 43.74 ( $\text{CH}_2\text{NH}$ ), 59.50 ( $\text{N}^+\text{CH}_2$ ), 63.00 ( $\text{CH}_2$ ), 128.57, 147.12 (aromatics, rest of signals not observed).  ${}^{31}\text{P}$  NMR (300 MHz,  $\text{CD}_3\text{OD}$ ):  $\delta$  18.12 ( $\text{N}_3\text{P}_3$ ). Anal. Calcd for:  $\text{C}_{240}\text{Cl}_{24}\text{H}_{426}\text{N}_{39}\text{P}_3\text{Si}_{18}$  (5307.54 g/mol): C, 54.31; H, 8.09; N, 10.29. Found: C, 53.78; H, 8.17; N, 10.15.

**Synthesis of dendrimer  $\{N_3P_3[(\text{Viologen})G_2\text{CBS}(\text{NH}_3)_4]_6\}(\text{Cl})_{36}$  (**12**).** The deprotection of dendrimer **10** (0.350, 0.030 mmol) with TFA (5 mL) was carried out in the similar way than the synthesis of **11**. The compound **12** was obtained as yellow solid (0.210 mg, 80 %).

${}^1\text{H}$  NMR (300 MHz,  $\text{CD}_3\text{OD}$ ):  $\delta$  0.03 (s, 198H,  $\text{SiMe}$  and  $\text{SiMe}_2$ ), 0.60 (m, 196H,  $\text{SiCH}_2\text{CH}_2\text{CH}_2\text{NH}$  and  $\text{SiCH}_2$ ), 1.40 (m, 92H,  $\text{CH}_2$ ), 1.66 (m, 48H,  $\text{CH}_2$ ), 2.07 (m, 12H,  $\text{N}^+\text{CH}_2\text{CH}_2$ ), 2.90 (m, 48H,  $\text{CH}_2\text{NH}$ ), 3.31 (s, 18H,  $\text{CH}_3$  overlapped with methanol), 4.74 (12H,  $\text{N}^+\text{CH}_2$ ), 5.93 (s, 12H,  $\text{CH}_2$ ), 7.50 (m, 12H,  $\text{H}^3$ ), 7.78 (m, 18H,  $\text{H}^2$  and  $\text{CH}=\text{N}$ ), 8.65 (m, 24H,  $\text{H}^6$  and  $\text{H}^9$ ), 9.27 (m, 24H,  $\text{H}^5$  and  $\text{H}^{10}$ ).  ${}^{13}\text{C}$   $\{^1\text{H}\}$  NMR (75 MHz,  $\text{CD}_3\text{OD}$ ):  $\delta$  -5.71 ( $\text{SiMe}$ ), -4.70 ( $\text{SiMe}_2$ ), 11.68 ( $\text{SiCH}_2\text{CH}_2\text{CH}_2\text{NH}$ ), 12.63-21.91

(SiCH<sub>2</sub>), 36.21 (N<sup>+</sup>CH<sub>2</sub>CH<sub>2</sub>), 42.34 (CH<sub>2</sub>NH), 62.58 (N<sup>+</sup>CH<sub>2</sub>), 64.47 (CH<sub>2</sub>), 128.51, 147.02 (aromatics, rest of signals not observed). <sup>31</sup>P NMR (300 MHz, CD<sub>3</sub>OD): δ 16.42 (N<sub>3</sub>P<sub>3</sub>). Anal. Calcd for: C<sub>384</sub>H<sub>785</sub>Cl<sub>36</sub>N<sub>51</sub>P<sub>3</sub>Si<sub>42</sub> (8666,50 g/mol): C, 53.22; H, 9.13; N, 8.24. Found: C, 52.93; H, 9.42; N, 7.94.

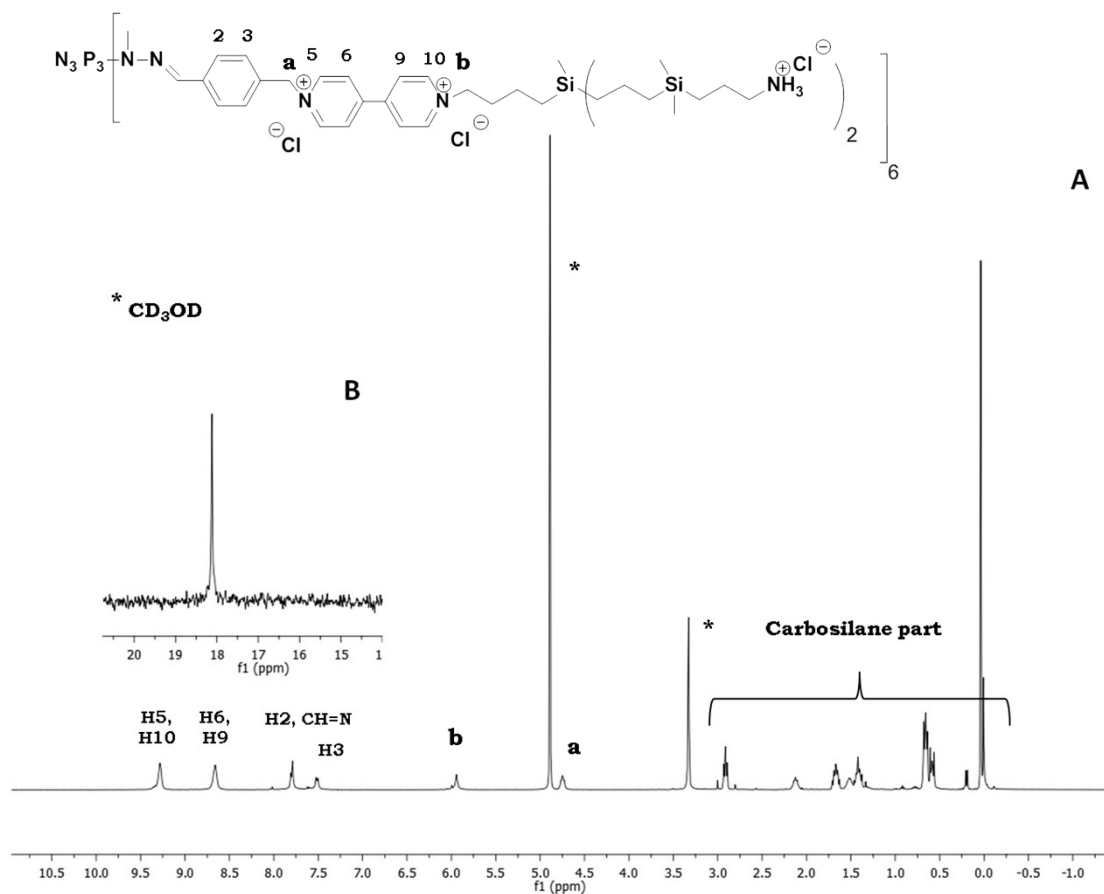

Figure S1.  $^1\text{H}$ (A) and  $^{31}\text{P}$ (B) NMR spectra of dendrimer **11** in  $\text{d}_6$ -methanol.

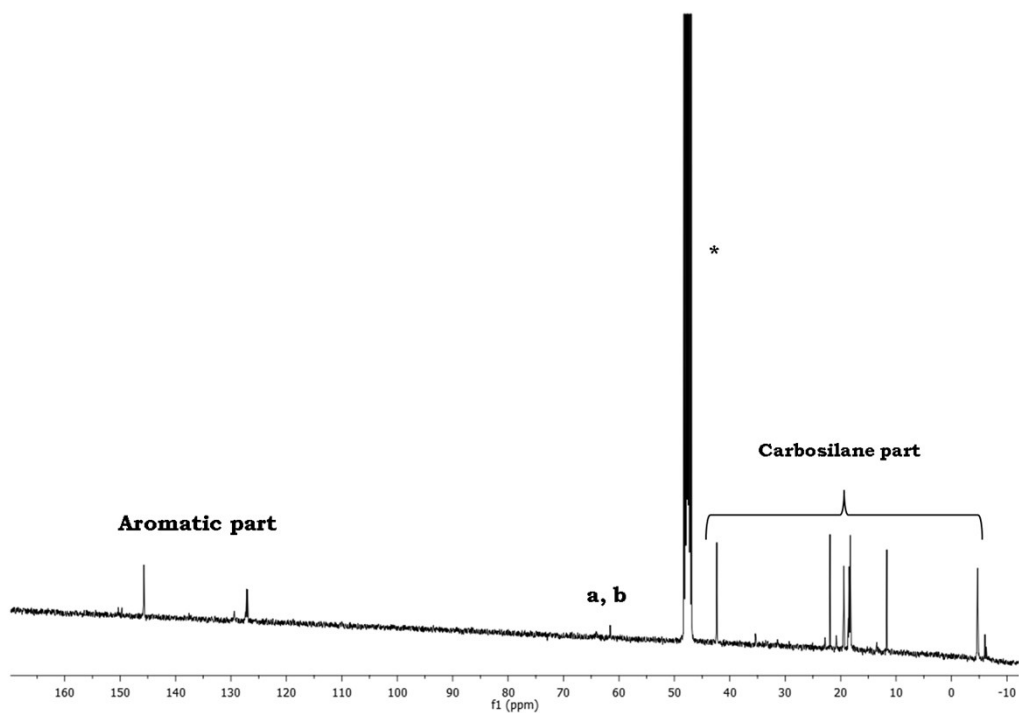

Figure S2.  $^{13}\text{C}$  NMR spectrum of dendrimer **11** in  $\text{d}_6$ -methanol.

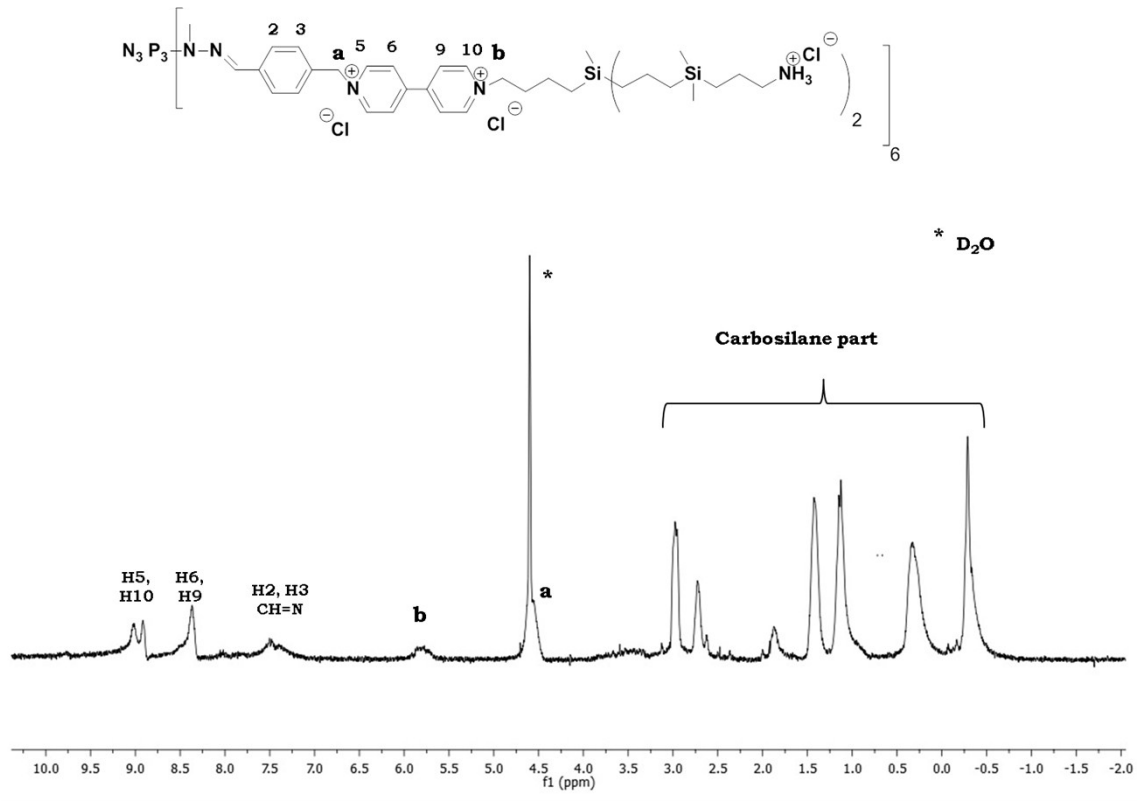

**Figure S3.**  $^1\text{H}$  NMR spectrum of dendrimer **11** in  $\text{D}_2\text{O}$ .

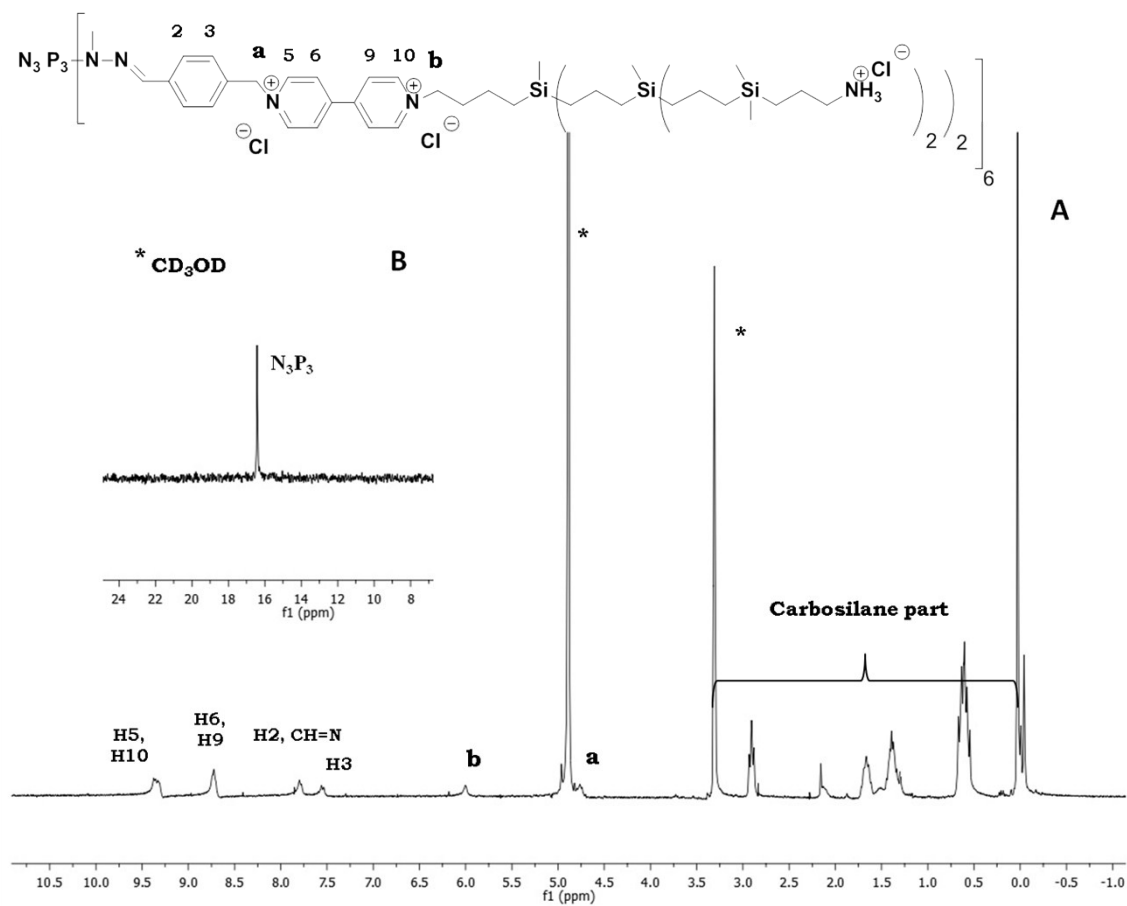

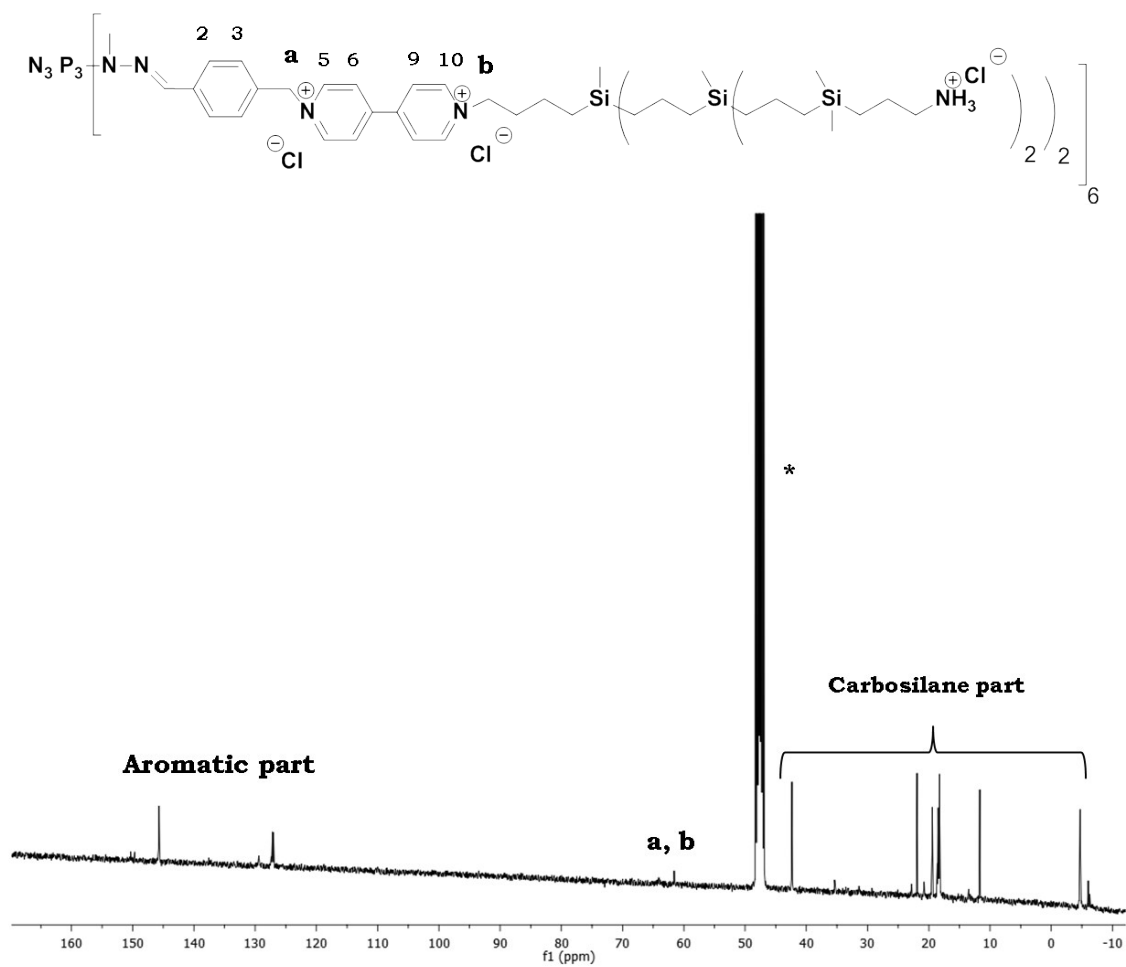

**Figure S5.**  $^{13}\text{C}$  NMR spectrum of dendrimer **12** in  $\text{d}_6$ -methanol.

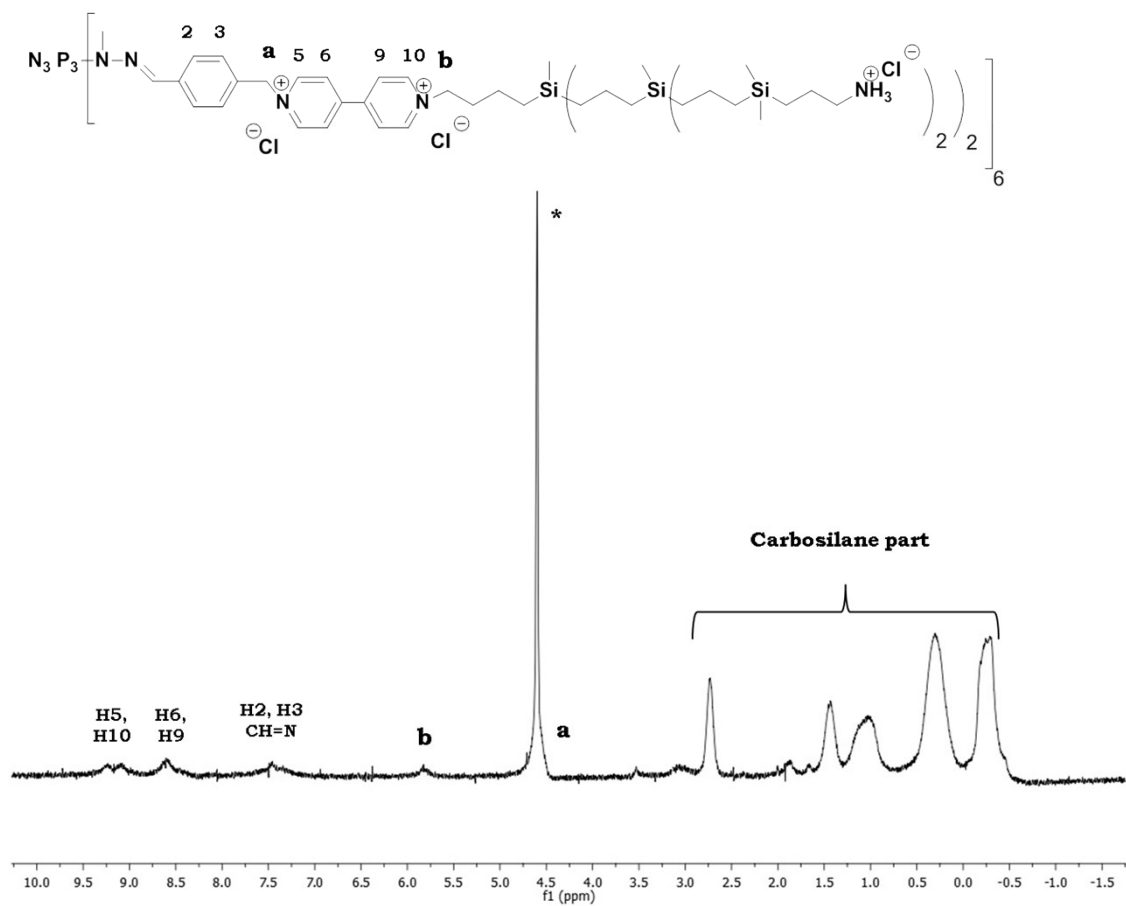

**Figure S6.**  $^1\text{H}$  NMR spectrum of dendrimer **12** in  $\text{D}_2\text{O}$ .



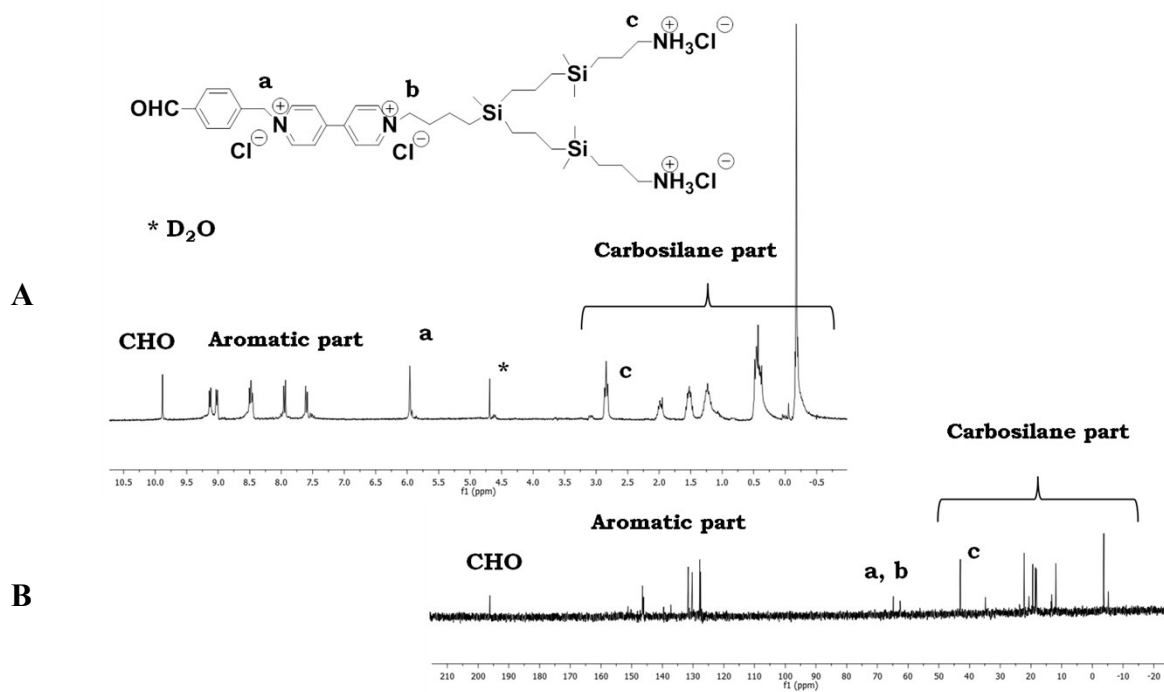

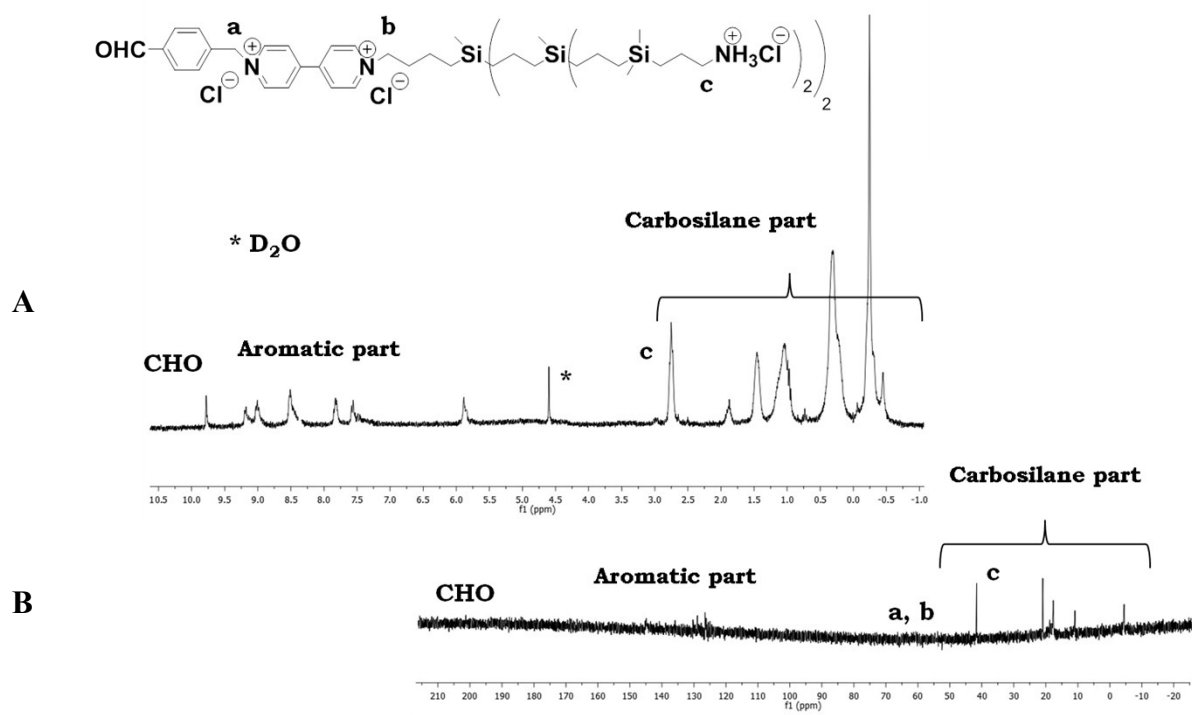

Supplement: c5ra00960j1.pdf [file c5ra00960j1.pdf]
